1 **Reference-free deconvolution of DNA methylation signatures identifies common**  
2 **differentially methylated gene regions on 1p36 across breast cancer subtypes**

3

4 Alexander J. Titus<sup>\*a,d</sup>, Gregory P. Way<sup>\*b</sup>, Kevin C. Johnson<sup>c,d</sup>, and Brock C.  
5 Christensen<sup>^d,e,f</sup>

6

7 \* Authors contributed equally

8 <sup>a</sup> Program in Quantitative Biomedical Sciences, Geisel School of Medicine at Dartmouth,  
9 Hanover, NH 03755

10 <sup>b</sup> Genomics and Computational Biology Graduate Program, University of Pennsylvania,  
11 Philadelphia, PA 19104

12 <sup>c</sup> The Jackson Laboratory for Genomic Medicine, Farmington, CT 06032, USA

13 <sup>d</sup> Department of Epidemiology,

14 <sup>e</sup> Department of Molecular and Systems Biology

15 <sup>f</sup> Department of Community and Family Medicine, Geisel School of Medicine at  
16 Dartmouth, Hanover, NH 03755

17

18 CORRESPONDING AUTHOR:

19 <sup>^</sup> 1 Medical Center Drive, Williamson Level 6, HB7650, Lebanon, NH 03766; Phone:  
20 603-650-1828; Fax: 603-650-1840 Brock.Christensen@Dartmouth.edu

21

22 AUTHOR EMAILS:

23 AT: Alexander.J.Titus.gr@dartmouth.edu

24 GW: GregWay@upenn.edu

25 KJ: Kevin.C.Johnson@jax.org

26 BC: Brock.Christensen@dartmouth.edu

27 ABSTRACT:

28 Breast cancer is a complex disease and studying DNA methylation (DNAm) in tumors is  
29 complicated by disease heterogeneity. We compared DNAm in breast tumors with  
30 normal-adjacent breast samples from The Cancer Genome Atlas (TCGA). We  
31 constructed models stratified by tumor stage and PAM50 molecular subtype and  
32 performed cell-type reference-free deconvolution on each model. We identified nineteen  
33 differentially methylated gene regions (DMGRs) in early stage tumors across eleven  
34 genes (*AGRN*, *C1orf170*, *FAM41C*, *FLJ39609*, *HES4*, *ISG15*, *KLHL17*, *NOC2L*,  
35 *PLEKHN1*, *SAMD11*, *WASH5P*). These regions were consistently differentially  
36 methylated in every subtype and all implicated genes are localized on chromosome  
37 1p36.3. We also validated seventeen DMGRs in an independent data set. Identification  
38 and validation of shared DNAm alterations across tumor subtypes in early stage tumors  
39 advances our understanding of common biology underlying breast carcinogenesis and  
40 may contribute to biomarker development. We also provide evidence on the importance  
41 and potential function of 1p36 in cancer.

42 INTRODUCTION:

43 Invasive breast cancer is a complex disease characterized by diverse etiologic  
44 factors<sup>1</sup>. Key genetic and epigenetic alterations are recognized to drive tumorigenesis and  
45 serve as gate-keeping events for disease progression<sup>2</sup>. Early DNA methylation (DNAm)  
46 events have been shown to contribute to breast cancer development<sup>3</sup>. Importantly, DNAm  
47 alterations have been implicated in the transition from normal tissue to neoplasia<sup>4,5</sup> and  
48 from neoplasia to metastasis<sup>6</sup>. Furthermore, patterns of DNAm are known to differ across  
49 molecular subtypes of breast cancer<sup>7</sup> - Luminal A (LumA), Luminal B (LumB), Her2-  
50 enriched and Basal-like – identified based on the prediction analysis of microarray 50 (PAM50)  
51 classification<sup>8</sup>. However, while DNAm differences across breast cancer subtypes have  
52 been explored, similarities across subtypes are less clear<sup>9</sup>. Such similarities found in early  
53 stage tumors can inform shared biology underpinning breast carcinogenesis and – as  
54 similarities would be agnostic to subtype – potentially contribute to biomarkers for early  
55 detection.

56 Studying DNAm in bulk tumors is complicated by disease heterogeneity.  
57 Heterogeneity is driven by many aspects of cancer biology including variable cell-type  
58 proportions found in the substrate used for molecular profiling<sup>10</sup>. Different proportions of  
59 stromal, tumor, and infiltrating immune cells may confound molecular profile  
60 classification when comparing samples<sup>11</sup> because cell types have distinct DNAm  
61 patterns<sup>12–14</sup>. The potential for cell–type confounding prompted the development of  
62 statistical methods to adjust for variation in cell-type proportions in blood<sup>15</sup> and solid  
63 tissue<sup>16</sup>. One such method, *RefFreeEWAS*, is a reference-free deconvolution method and  
64 does not require a reference population of cells with known methylation patterns and is  
65 agnostic to genomic location when performing deconvolution<sup>17</sup>. Instead, the unsupervised

66 method infers underlying cell-specific methylation profiles through constrained non-  
67 negative matrix factorization (NMF) to separate cell-specific methylation differences  
68 from actual aberrant methylation profiles observed in disease states. This method has  
69 previously been shown to effectively determine the cell of origin in breast tumor  
70 phenotypes<sup>18</sup>.

71 We applied *RefFreeEWAS* to TCGA breast cancer DNAm data and estimated cell  
72 proportions across the set. We compared tumor DNAm with adjacent normal tissue  
73 stratified by tumor subtype<sup>9</sup> and identified common early methylation alterations across  
74 molecular subtypes that are independent of cell type composition. We identified a  
75 specific chromosomal location, 1p36.3, that harbors all 19 of the differentially methylated  
76 regions that are in common to early stage breast cancer subtypes. 1p36 is a well-studied  
77 and important region in many different cancer types, but there remain questions about  
78 how it may impact carcinogenesis and disease progression<sup>19</sup>. Our study provides evidence  
79 that methylation in this region may provide important clues about early events in breast  
80 cancer. We also performed *RefFreeEWAS* on an independent validation set (GSE61805)  
81 and confirmed these results<sup>20</sup>.

82

## 83 RESULTS:

### 84 *DNA methylation deconvolution*

85 Subject age and tumor characteristic data stratified by PAM50 subtype and stage  
86 is provided in Table 1 for the 523 TCGA tumors analyzed. TCGA breast tumor sample  
87 purity, estimated by pathologists from histological slides, was consistent across PAM50  
88 subtypes and stages indicating that observed methylation differences are not

89 predominantly a result of large differences in tumor purity (Supplementary Fig. S1). To  
 90 correct for cell-proportion differences across tumor samples, we estimated the number of  
 91 cellular methylation profiles contributing to the mixture differences by applying NMF to  
 92 the matrix of beta values, which resulted in model specific dimensionality estimates  
 93 indicating diverse cellular methylation profiles (Supplementary Table S1). The reference-  
 94 free deconvolution altered the number and extent of significant differentially methylated  
 95 CpGs across all models that compared breast tumor methylation with adjacent normal  
 96 samples (Supplementary Fig. S2).

**Table 1.** Sample information stratified by PAM50 subtype

|                | Basal-like  | Her2      | Luminal A | Luminal B   | Total with Assignment |
|----------------|-------------|-----------|-----------|-------------|-----------------------|
| TCGA tumors    | 86          | 31        | 279       | 127         | 523                   |
| Age, mean (SD) | 56.8 (12.8) | 60 (12.8) | 58 (13.5) | 57.1 (12.6) | 57.8 (13.1)           |
| Stage*, n (%)  | --          | --        | --        | --          | --                    |
| Early (I/II)   | 70 (81%)    | 20 (65%)  | 207 (74%) | 84 (66%)    | 381 (73%)             |
| Late (III/IV)  | 14 (16%)    | 10 (32%)  | 69 (25%)  | 42 (33%)    | 135 (26%)             |
| Missing        | 2 (2%)      | 1 (3%)    | 3 (1%)    | 1 (1%)      | 7 (1%)                |

\*AJCC characterized stage, provided by TCGA

97

98 *Subtype specific methylation patterns*

99 In early stage tumors, we identified a set of nineteen DMGRs shared among  
 100 Luminal A, Luminal B, Her2, and Basal-like subtypes (DMGRs  $Q < 0.01$ , Figure 1A). In  
 101 the late stage tumors, we identified 31,931 DMGRs in common across subtypes (Figure  
 102 1B).

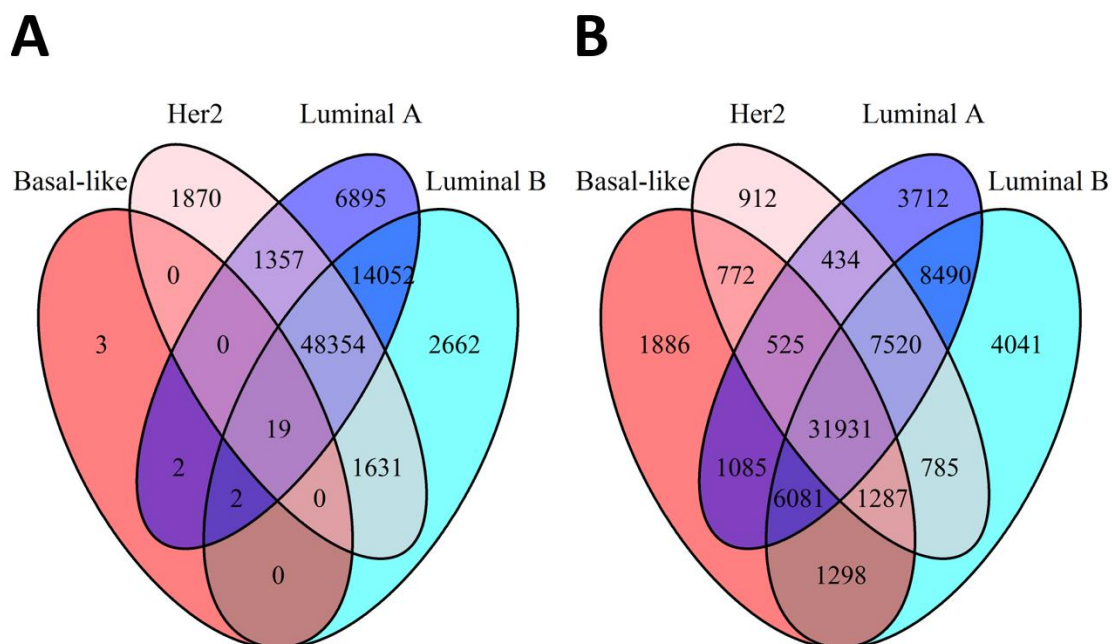

103

104 **Figure 1.** Numbers of overlapping differentially methylated gene regions in (A) early  
 105 stage tumors ( $n = 76,847$ ) and (B) late stage tumors ( $n = 70,759$ ) stratified by Basal-like,  
 106 Her2, Luminal A, and Luminal B PAM50 subtypes with a  $Q$ -value cutoff of 0.01.

107

108 Subtype specific methylation patterns in early stage tumors were most divergent for  
 109 Basal-like tumors versus other types, while in late stage tumors methylation alterations in  
 110 Luminal B tumors were most divergent (Supplementary Table S2). To test if collapsing  
 111 by genomic region had an appreciable effect on detecting DMGRs, we compared DMGR  
 112 results to results derived from regions defined by CpG island status (i.e. CpG island,  
 113 Shore, Shelf, Open Sea). Using CpG island context designations indicated similar results  
 114 (Supplementary Fig S3), though a lower number of common DMGRs were observed.

115 Therefore, downstream analyses used DMGRs identified based on probe position in  
116 relation to TSS.

117 We identified nineteen DMGRs with common methylation alterations among  
118 tumor subtypes in comparison with normal tissues that were annotated to eleven genes:  
119 *AGRN*, *C1orf170*, *FAM41C*, *FLJ39609*, *HES4*, *ISG15*, *KLHL17*, *NOC2L*, *PLEKNH1*,  
120 *SAMD11*, and *WASH5P* (Supplementary Table S3).

121 Dependent upon tumor subtype, some gene regions had a different directional  
122 change in tumor methylation compared to normal tissue (e.g. *C1orf170*, *HES4*, and  
123 *ISG15*). Additionally, of the eleven genes identified, we observed differential methylation  
124 in different regions including gene body, promoter (TSS1500, and TSS200), and 3'UTR  
125 (Table 2 and Supplementary Table S3). All nineteen DMGRs also had differential  
126 methylation in at least one late stage tumor subtype, and thirteen of the nineteen DMGRs  
127 were significantly differentially methylated across all tumor subtypes in late stage tumors  
128 (Table 2 and Supplementary Table S4). A heatmap of the unadjusted beta values for  
129 individual CpGs from the nineteen DMGRs demonstrated grouping of most of the Basal-  
130 like tumors separate from a group of mixed Luminal and Her2 tumors (Figure 2).

**Table 2.** Nineteen differentially methylated gene regions in common to early stage tumors.

| <i>DMGR</i>      | <i>Alternate Gene Name</i> | <i>Basal Med Q</i> | <i>Her2 Med Q</i> | <i>Lum A Med Q</i> | <i>Lum B Med Q</i> | <i>*Any late stage</i> | <i>*All late stage</i> | <i>Present in validation</i> | <i>Validation Median Q</i> |
|------------------|----------------------------|--------------------|-------------------|--------------------|--------------------|------------------------|------------------------|------------------------------|----------------------------|
| AGRN Body        | AGNR                       | 2.44E-06           | 1.68E-04          | 1.82E-07           | 1.29E-06           | Y                      | --                     | Y                            | 7.80E-21                   |
| C1orf170 Body    | PERM1                      | 4.03E-11           | 1.68E-05          | 5.46E-09           | 9.69E-04           | Y                      | Y                      | Y                            | 1.31E-08                   |
| C1orf170 TSS1500 | PERM1                      | 5.40E-04           | 6.52E-03          | 7.82E-06           | 6.82E-05           | Y                      | --                     | Y                            | 9.23E-03                   |
| FAM41C Body      | FAM41C                     | 4.13E-03           | 4.20E-08          | 1.18E-20           | 3.43E-03           | Y                      | Y                      | Y                            | 8.25E-10                   |
| FAM41C TSS1500   | FAM41C                     | 3.27E-04           | 1.11E-04          | 8.38E-05           | 1.04E-34           | Y                      | Y                      | Y                            | 1.75E-24                   |
| FLJ39609 TSS200  | LOC100130417               | 1.30E-04           | 6.02E-05          | 2.92E-06           | 3.67E-04           | Y                      | Y                      | Y                            | 5.24E-06                   |
| HES4 TSS1500     | HES4                       | 3.06E-03           | 5.15E-04          | 7.84E-05           | 2.20E-04           | Y                      | --                     | Y                            | 5.06E-04                   |
| ISG15 Body       | ISG15                      | 3.14E-07           | 2.40E-04          | 1.18E-05           | 3.58E-04           | Y                      | Y                      | --                           | 1.03E-01                   |
| KLHL17 3'UTR     | KLHL17                     | 3.14E-05           | 5.51E-07          | 3.83E-16           | 2.27E-03           | Y                      | Y                      | Y                            | 3.99E-08                   |
| KLHL17 Body      | KLHL17                     | 5.90E-06           | 1.10E-04          | 7.85E-04           | 7.24E-05           | Y                      | --                     | Y                            | 1.60E-06                   |
| NOC2L Body       | NOC2L                      | 3.15E-04           | 6.15E-04          | 6.56E-05           | 2.40E-06           | Y                      | Y                      | Y                            | 4.90E-11                   |
| PLEKHN1 3'UTR    | PLEKHN1                    | 5.17E-16           | 4.73E-06          | 3.10E-07           | 7.74E-06           | Y                      | --                     | Y                            | 9.83E-09                   |
| PLEKHN1 Body     | PLEKHN1                    | 8.94E-10           | 2.71E-09          | 7.58E-29           | 1.73E-30           | Y                      | Y                      | Y                            | 5.87E-18                   |
| PLEKHN1 TSS1500  | PLEKHN1                    | 3.14E-05           | 5.51E-07          | 2.59E-06           | 3.63E-07           | Y                      | Y                      | Y                            | 3.99E-08                   |
| PLEKHN1 TSS200   | PLEKHN1                    | 1.56E-18           | 5.77E-10          | 1.42E-03           | 1.22E-03           | Y                      | Y                      | Y                            | 2.93E-10                   |
| SAMD11 5'UTR     | SAMD11                     | 3.58E-03           | 7.23E-12          | 1.01E-09           | 2.21E-08           | Y                      | Y                      | Y                            | 4.59E-11                   |
| SAMD11 Body      | SAMD11                     | 7.13E-08           | 2.47E-08          | 8.49E-06           | 2.04E-04           | Y                      | Y                      | Y                            | 3.26E-23                   |
| SAMD11 TSS1500   | SAMD11                     | 2.38E-03           | 6.14E-04          | 8.56E-04           | 1.02E-03           | Y                      | Y                      | Y                            | 2.02E-05                   |
| WASH5P Body      | WASH7P                     | 2.93E-03           | 9.84E-03          | 1.64E-03           | 1.25E-05           | Y                      | --                     | --                           | 7.01E-02                   |

\*Reference to any or all breast cancer subtypes in late stage tumors



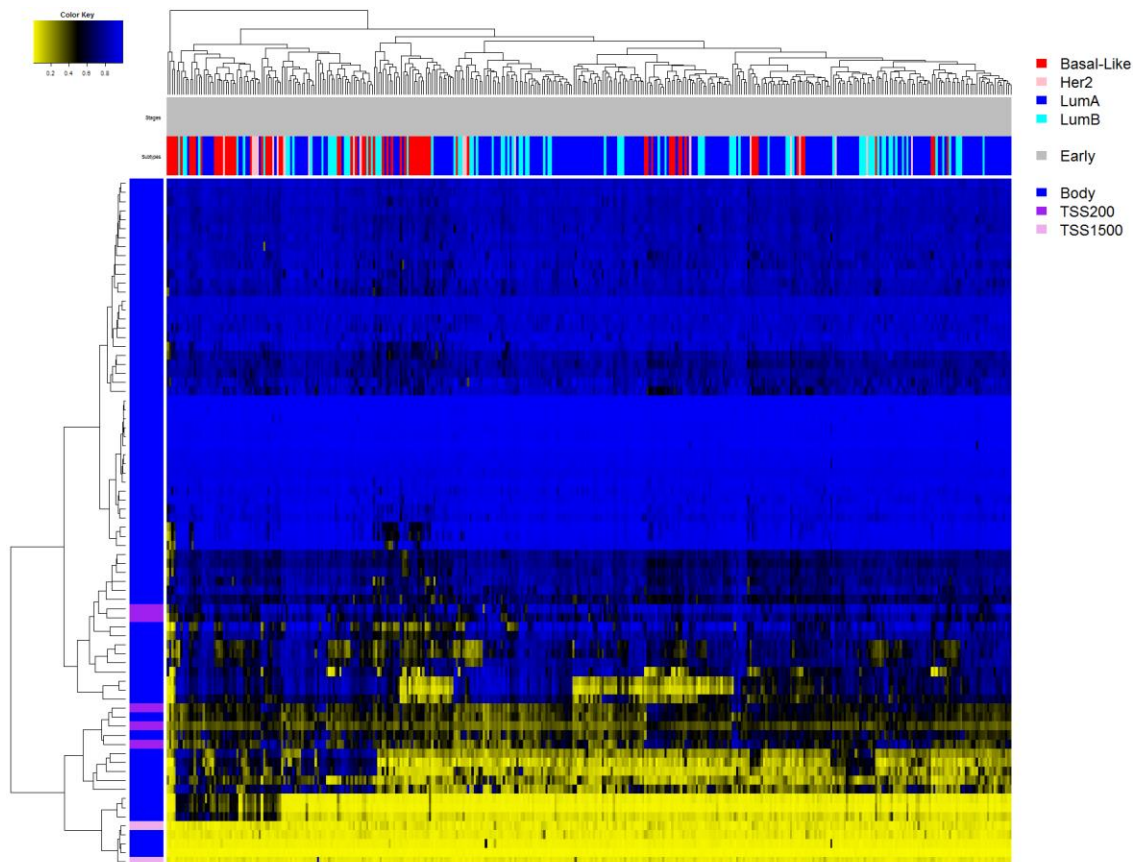

132

133 **Figure 2.** Raw beta value (unadjusted for cellular composition) heatmap of the  
134 significantly differentially methylated CpG sites mapping to the common early stage  
135 differentially methylated gene regions. The genomic context is given in the vertical color  
136 bar and the PAM50 subtype and tumor information (stage and subtype) are given in the  
137 horizontal bars. Yellow indicates low methylation and blue indicates high methylation  
138 beta values.

139

140 *DMGRs cluster on chromosome 1p36 and on gene bodies*

141 Of the nineteen DMGRs identified, all of them are in eleven genes located on the  
142 p36.3 cytoband of chromosome 1 (Supplementary Figure S4). Chromosome 1p36.3 is the  
143 start section of chromosome 1 and of the eleven genes identified, one (*WASH5P*) is

144 located near the very start of the chromosome (chr1:14,362 - 29,370) and the other ten  
145 genes are located end-to-end between chr1:868,071 - 1,056,116 (Supplementary Figure  
146 S4).

147 Most of the DMGRs tracked to gene body regions: *AGRN*, *C1orf170*, *FAM41C*,  
148 *ISG15*, *KLHL17*, *NOC2L*, *PLEKHNI*, *SAMD11*, and *WASH5P* all had gene body  
149 methylation differences. Gene body regions were enriched among early stage tumor  
150 DMGRs compared to all other regions (Fisher's Exact Test OR = 4.15, 95% CI = 1.04 –  
151 23.83,  $P = 0.04$ ). All differentially methylated CpG probe IDs are given in  
152 Supplementary Table S5. DAVID pathway analysis applied to the top 400 most  
153 aberrantly methylated genes in common to the four PAM50 subtypes identified the GO  
154 term for the regulation of hormone levels to be significantly enriched (GO:0010817,  $FDR$   
155 = 0.035, Supplementary Table S6).

156

#### 157 *Breast cancer copy number alterations in 1p36*

158 Among these 523 tumors, the prevalence of 1p36.3 copy number alteration was  
159 only 1.2% (n=6), all were amplifications that affected ten of the eleven genes most distal  
160 to the chromosome end. Among the six tumors with 1p36.3 amplification three were  
161 Basal-like, two were Her2-enriched, and one was Luminal A. Exclusive of tumors with  
162 copy number alterations, there was one tumor (Her2-enriched), with a truncating  
163 mutation in *KLHL17*, and one tumor with a missense mutation in *PLEKHNI* (Basal-like).

164

165

166

167 *DMGRs impact gene expression*

168 We identified CpG sites with significant correlation of methylation with gene  
169 expression for five genes (*AGRN*, *PLEKHN1*, *KLHL17*, *SAMD11*, and *FAM41C*),  
170 associated with eight DMGRs (Supplementary Table S7 and Supplementary Figures S6-  
171 9).

172

173 *Validating DMGR hits in an independent dataset*

174 We validated our findings in an independent 450K methylation data set from 186  
175 tumors and 46 normal tissues described in Fleischer *et al.* (GSE60185). Seventeen of  
176 nineteen DMGRs were significantly differentially methylated between tumor and normal  
177 tissues in the replication set (all DMGRs at  $Q < 0.01$ ; Table 2), and CpGs in these  
178 DMGRs had similar patterns of beta value distributions (Supplemental Figure S10). The  
179 remaining two gene regions were also highly ranked in the  $q$  value distribution (*WASH5P*  
180 body:  $Q = 0.07$ ; *ISG15* Body:  $Q = 0.10$ ).

181

182 *Reproducibility*

183 All TCGA and validation data is publicly available. We also provide software  
184 under an open source license for analysis reproducibility and to build upon our work<sup>21</sup>.

185

186 DISCUSSION:

187 We were interested in identifying common biology underlying breast cancer  
188 independent of molecular subtype and cell-type proportion. After applying a reference-  
189 free deconvolution algorithm, we observed that early stage tumors harbor differentially

190 methylated gene regions localized entirely to a small region on 1p36.3 shared across four  
191 major subtypes. Although DNA methylation alterations are widespread in early stage  
192 tumors and prior work has demonstrated alterations that differ among breast tumor  
193 subtypes<sup>9,22</sup> we observed only 19 DMGRs that overlapped molecular subtypes. All  
194 DMGRs tracking to the same region on 1p36.3 suggests that altered regulation of this  
195 region contributes to breast carcinogenesis irrespective of disease subtype.

196 Previously, alterations on chromosome 1 have been observed in breast cancer cell  
197 lines and tumors<sup>23</sup>. Additionally, copy number deletions in this region have been shown  
198 to be an important precursor in DCIS tumors<sup>24</sup> and in follicular lymphomas<sup>25</sup>. However,  
199 the most prevalent copy number alterations on chromosome 1 are gains on the *q* arm and  
200 losses on the *p* arm that do not typically fully encompass our implicated genes on  
201 1p36.3<sup>23,26,27</sup>. The region is also well-studied and significantly altered in neuroblastoma –  
202 the most common solid tissue tumor of childhood<sup>28–31</sup>. The biological underpinnings of  
203 this region remain elusive<sup>19,32</sup> but a systematic understanding of how these specific  
204 DMGRs may impact early cancer development may be important for other cancer types  
205 and not just breast cancer.

206 Of the nineteen DMGRs identified, eighteen of them replicated in either one or  
207 both late stage and independent validation sets. The one DMGR that did not replicate was  
208 the *WASH5P body*. This region is located more than 830,000 base pairs (bp) away from  
209 the much tighter region spanned by the remaining eighteen DMGRs (~188,000 bp),  
210 suggesting a loose association between *WASH5P* and the other ten genes.

211 There is also additional evidence implicating the potential importance of the  
212 identified genes assigned to the differentially methylated regions. For example, in a study

213 of mutational profiles in metastatic breast cancers, *AGRN* was more frequently mutated in  
214 metastatic cancers compared with early breast cancers<sup>33</sup>. Similarly, expression of the  
215 *HES4* Notch gene is known to be significantly correlated with the presence of activating  
216 mutations in multiple breast cancer cell lines, and is associated with poor patient  
217 outcomes<sup>34</sup>. In addition, *ISG15* has been implicated as a key player in breast  
218 carcinogenesis<sup>35</sup>, though there is conflicting evidence<sup>36</sup>. However, the conflicting  
219 evidence to date may be related to our observation of *ISG15* hypomethylation in Basal-  
220 Like, Her2, and LumB tumors, and hypermethylation in LumA tumors (Supplementary  
221 Table S3). Opposing methylation states among tumor subtypes relative to normal tissue  
222 may contribute to subtype-specific roles of *ISG15* dysregulation in breast carcinogenesis.  
223 Additionally, the *NOC2L* gene has been identified as a member of a group of prognostic  
224 genes derived from an integrated microarray of breast cancer studies<sup>37</sup>. We also identified  
225 three DMGRs – TSS1500, Body, & 5'UTR – in the *SAMD11* gene, which has  
226 significantly reduced expression in breast cancer cells compared to normal tissues<sup>38</sup>,  
227 consistent with our findings of *SAMD11* hypermethylation across all four breast cancer  
228 subtypes. As DNAm changes were observed consistently and robustly across subtypes, it  
229 is likely that several of the other identified genes are cancer initiation factors that require  
230 additional study.

231       Importantly, we validated the identified DMGRs in an independent set of invasive  
232 breast tumors and normal tissues. Our validation is strengthened by the lack of molecular  
233 subtype assignments in the validation set. The validation of DMGRs in a setting agnostic  
234 to intrinsic subtype indicates that differential magnitude or direction of methylation  
235 alterations that may be present in different subtypes did not limit our ability to identify

236 significant alterations. A limitation of the validation set is a lack of gene expression data  
237 to further investigate relationships between expression and methylation for each gene  
238 region. Nevertheless, additional targeted studies on this set of validated genes and gene  
239 regions can enhance the understanding of methylation alterations at these DMGRs in  
240 breast carcinogenesis.

241 Caution should be exercised in interpreting the results of the adjusted beta  
242 coefficients from the reference-free algorithm. It is unclear if specific disease states are a  
243 result of aberrant methylation profiles in specific cell types which then cause changes to  
244 cell mixtures, or if the disease state is a result of cell-type proportion differences.  
245 Additionally, the unsupervised clustering heatmaps plot unadjusted methylation beta  
246 values and do not account for cell type adjustment. Lastly, the DMGR analysis drops  
247 CpGs that do not track to gene regions, which may reduce detection of non-genic regions  
248 related with breast carcinogenesis.

249 We identified and validated DMGRs in early stage breast tumors across PAM50  
250 subtypes that are located on chromosome 1p36.3. The observed differential methylation  
251 suggests that this region may contribute to the initiation or progression to invasive breast  
252 cancer. Additional work is needed to investigate the scope of necessary and sufficient  
253 alterations to 1p36.3 for transformation and to more clearly understand the implications  
254 of 1p36.3 methylation alterations to gene regulation. Further investigation of DNAm  
255 changes to 1p36.3 may identify opportunities for early identification of breast cancer or  
256 risk assessment. Lastly, the reference-free approach we used could be applied to  
257 methylation datasets from other tumor types to identify potential drivers of  
258 carcinogenesis common across histologic or intrinsic molecular subtypes.

259

260 PATIENTS & METHODS:

261 *Data Processing*

262 We accessed breast invasive carcinoma Level 1 Illumina HumanMethylation450  
263 (450K) DNAm data (n = 870) from the TCGA data access portal and downloaded all  
264 sample intensity data (IDAT) files. We processed the IDAT files with the R package  
265 *minfi* using the “Funnorm” normalization method on the full dataset<sup>39</sup>. We filtered CpGs  
266 with a detection *P*-value > 1.0E-05 in more than 25% of samples, CpGs with high  
267 frequency SNP(s) in the probe, probes previously described to be potentially cross-  
268 hybridizing, and sex-specific probes<sup>40,41</sup>. We filtered samples that did not have full  
269 covariate data (PAM50 subtype, pathologic stage<sup>42,12</sup>) and full demographic data (age and  
270 sex). All tumor adjacent normal samples were included regardless of missing data (n =  
271 97, Table 1).

272 From an original set of 485,512 measured CpG sites on the Illumina 450K array,  
273 our filtering steps removed 2,932 probes exceeding the detection *P*-value limit, and  
274 93,801 probes that were SNP-associated, cross-hybridizing, or sex-specific resulting in a  
275 final analytic set of 388,779 CpGs. From 870 TCGA breast tumors, we restricted to  
276 primary tumors with available PAM50 intrinsic subtype assignments of Basal-like (n =  
277 86), Her2 (n = 31), Luminal A (n = 279), and Luminal B (n = 127), excluding Normal-  
278 like tumors due to limited sample size (n = 18). Lastly, we restricted the final total tumor  
279 set to only those with stage assignments resulting in a final analytic sample size of n =  
280 523.

281



282 *Reference-free cell type adjustment modeling*

283 We stratified samples by PAM50 subtype (Basal-like, Luminal A, Luminal B,  
284 Her2) and then by tumor stage dichotomizing as early (stage I and II tumors) and late  
285 (stage III and IV tumors)<sup>42</sup>, resulting in eight distinct models. To analyze DNAm  
286 differences between tumor and normal tissue and to adjust for effects of cellular  
287 heterogeneity across samples, we applied the reference-free deconvolution algorithm  
288 from the *RefFreeEWAS* R package to each model adjusting for age<sup>16</sup>. The method  
289 estimates the number of underlying tissue-specific cell methylation states contributing to  
290 methylation heterogeneity through a constrained variant of NMF<sup>43</sup>. Briefly, the method  
291 assumes the sample methylome is composed of a linear combination of the constituent  
292 methylomes. It decomposes the matrix of sample methylation values ( $Y$ ) into two  
293 matrices ( $Y = M\Omega^T$ ), where  $M$  is an  $m \times K$  matrix of  $m$  CpG-specific methylations states  
294 for  $K$  cell types and  $\Omega$  is a  $n \times K$  matrix of subject-specific cell-types.  $K$  is selected via  
295 bootstrapping  $K = 2 \dots 10$  and choosing the optimal  $K$  that minimizes the bootstrapped  
296 deviance. To correct for multiple comparisons, we converted all extracted  $P$ -values to  $Q$ -  
297 values using the R package *qvalue*<sup>44</sup>.

298

299 *Identifying differentially methylated gene regions*

300 To understand the genomic regions with common DNAm alterations we grouped  
301 CpGs by gene and region relative to genomic location (transcription start site 1500  
302 (TSS1500), TSS200, 3' untranslated region (3'UTR), 5'UTR, 1<sup>st</sup> exon, and gene body).  
303 We used this gene-region taxonomy to collapse differentially methylated CpGs, as  
304 defined by our  $Q$ -value cutoff, into specific differentially methylated gene regions



305 (DMGRs). This extended the Illumina 450K CpG annotation file to allow for a given  
306 CpG to be associated with up to two genes depending on the proximity of the CpG site to  
307 neighboring genes (Figure 3).

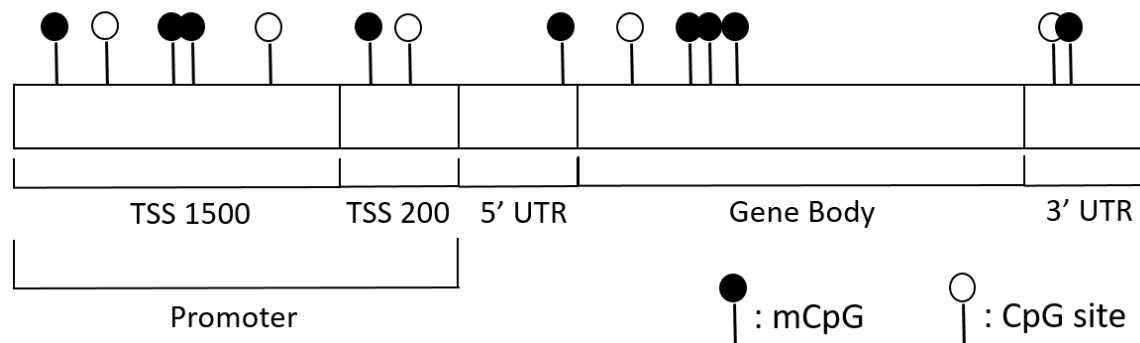

309 **Figure 3.** Diagram of CpG sites relative to gene regions (Transcription start sites  
310 (TSS1500 & TSS200), Untranslated regions (5'UTR & 3'UTR), and the gene body). Dark  
311 circles indicate methylated sites and empty circles indicate unmethylated sites.

312

313 We defined a differentially methylated CpG as one with a  $Q$ -value  $< 0.01$  following cell-  
314 type adjustment in a specific subtype model compared to normal tissue. To identify  
315 DMGR sets for each stage and subtype, we analyzed all eight models independently.

316

### 317 *Pathway Analysis*

318 We performed a DAVID (the database for annotation, visualization and integrated  
319 discovery) analysis<sup>45,46</sup> for the 400 genes with the lowest median CpG  $Q$ -values that are  
320 in common to all early stage tumors regardless of PAM50 subtype, and extracted  
321 enriched Gene Ontology (GO)<sup>47</sup> and Kyoto Encyclopedia of Genes and Genomes  
322 (KEGG)<sup>48</sup> terms. We selected the top 400 genes based on recommended gene list sizes<sup>49</sup>.

323

324 *Copy number, gene expression, and genomic location*

325 We downloaded TCGA Breast Invasive Carcinoma CNV data<sup>9</sup> and normalized  
326 RNAseq using cBioPortal<sup>50</sup>. For the DMGRs we identified, we analyzed the prevalence  
327 of copy number alterations and mutations in each gene across all samples, stratified by  
328 molecular subtype. Similarly, to determine whether these DMGRs affect gene expression  
329 of their target gene, we calculated Spearman correlations of DNAm beta values in  
330 significant CpGs ( $Q < 0.01$ ) to matched sample Illumina HiSeq gene expression data. We  
331 used a Bonferroni correction to determine significant expression differences, resulting in  
332 an acceptance alpha value of  $9.36E-5$ .

333

334 *Validation*

335 To confirm the identified early stage DMGRs in common among intrinsic  
336 molecular subtypes we applied the analysis workflow to TCGA late stage tumors and an  
337 independent validation set (GSE60185)<sup>20</sup>. The validation set includes samples of ductal  
338 carcinoma *in situ* (DCIS), mixed, invasive, and normal histology collected from Akershus  
339 University Hospital and from the Norwegian Radium Hospital. We analyzed only the  
340 invasive samples compared to normal samples using the same bioinformatics pipeline of  
341 quality control CpG filtering steps and normalization procedures. However, we did not  
342 have complete age information or intrinsic subtype assignments for the validation set and  
343 the models are not adjusted for age or stratified by subtype. This resulted in a single  
344 model comparing 186 invasive tumors with 46 normal controls measured across 390,253  
345 CpGs.

346

347 ACKNOWLEDGEMENTS:

348 Funding was provided by P20GM104416 and R01DE02277 (BCC), by the Quantitative  
349 Biomedical Sciences graduate program, and through a BD2K Fellowship to AJT  
350 (T32LM012204).

351

352 COMPETING INTERESTS:

353 The authors declare that they have no competing interests

354 REFERENCES:

- 355 1. Perou CM, Sørлие T, Eisen MB, van de Rijn M, Jeffrey SS, Rees CA, Pollack JR, Ross  
356 DT, Johnsen H, Akslen LA, Fluge O, Pergamenschikov A, Williams C, Zhu SX,  
357 Lønning PE, Børresen-Dale AL, Brown PO, Botstein D. Molecular portraits of  
358 human breast tumours. *Nature*. 2000 Aug 17;406(6797):747–752. PMID:  
359 10963602
- 360 2. Vogelstein B, Papadopoulos N, Velculescu VE, Zhou S, Diaz LA, Kinzler KW.  
361 Cancer genome landscapes. *Science*. 2013 Mar 29;339(6127):1546–1558.  
362 PMID: PMC3749880
- 363 3. Jones PA, Baylin SB. The fundamental role of epigenetic events in cancer. *Nat*  
364 *Rev Genet*. 2002 Jun;3(6):415–428. PMID: 12042769
- 365 4. Yang X, Yan L, Davidson NE. DNA methylation in breast cancer. *Endocr Relat*  
366 *Cancer*. 2001 Jun;8(2):115–127. PMID: 11446343
- 367 5. Baylin SB, Esteller M, Rountree MR, Bachman KE, Schuebel K, Herman JG.  
368 Aberrant patterns of DNA methylation, chromatin formation and gene  
369 expression in cancer. *Hum Mol Genet*. 2001 Apr;10(7):687–692. PMID:  
370 11257100
- 371 6. Fang F, Turcan S, Rimmer A, Kaufman A, Giri D, Morris LGT, Shen R, Seshan V,  
372 Mo Q, Heguy A, Baylin SB, Ahuja N, Viale A, Massague J, Norton L, Vahdat LT,  
373 Moynahan ME, Chan TA. Breast cancer methylomes establish an epigenomic  
374 foundation for metastasis. *Sci Transl Med*. 2011 Mar 23;3(75):75ra25. PMID:  
375 PMC3146366
- 376 7. Kamalakaran S, Varadan V, Giercksky Russnes HE, Levy D, Kendall J, Janevski A,  
377 Riggs M, Banerjee N, Synnestvedt M, Schlichting E, Karesen R, Shama Prasada K,  
378 Rotti H, Rao R, Rao L, Eric Tang M-H, Satyamoorthy K, Lucito R, Wigler M,  
379 Dimitrova N, Naume B, Borresen-Dale A-L, Hicks JB. DNA methylation patterns  
380 in luminal breast cancers differ from non-luminal subtypes and can identify  
381 relapse risk independent of other clinical variables. *Mol Oncol*. 2011  
382 Feb;5(1):77–92. PMID: 21169070
- 383 8. Sørлие T, Perou CM, Tibshirani R, Aas T, Geisler S, Johnsen H, Hastie T, Eisen MB,  
384 van de Rijn M, Jeffrey SS, Thorsen T, Quist H, Matese JC, Brown PO, Botstein D,  
385 Lønning PE, Børresen-Dale A-L. Gene expression patterns of breast carcinomas  
386 distinguish tumor subclasses with clinical implications. *Proc Natl Acad Sci*.  
387 2001 Sep 11;98(19):10869–10874. PMID: 11553815
- 388 9. Cancer Genome Atlas Network. Comprehensive molecular portraits of human  
389 breast tumours. *Nature*. 2012 Oct 4;490(7418):61–70. PMID: PMC3465532

- 390 10. Beca F, Polyak K. Intratumor Heterogeneity in Breast Cancer. *Adv Exp Med Biol.*  
391 2016;882:169–189. PMID: 26987535
- 392 11. Yoshihara K, Shahmoradgoli M, Martinez E, Vegesna R, Kim H, Torres-Garcia W,  
393 Trevino V, Shen H, Laird PW, Levine DA, Carter SL, Getz G, Stemke-Hale K, Mills  
394 GB, Verhaak RGW. Inferring tumour purity and stromal and immune cell  
395 admixture from expression data. *Nat Commun.* 2013;4:2612. PMCID:  
396 PMC3826632
- 397 12. Bloushtain-Qimron N, Yao J, Snyder EL, Shipitsin M, Campbell LL, Mani SA, Hu  
398 M, Chen H, Ustyansky V, Antosiewicz JE, Argani P, Halushka MK, Thomson JA,  
399 Pharoah P, Porgador A, Sukumar S, Parsons R, Richardson AL, Stampfer MR,  
400 Gelman RS, Nikolskaya T, Nikolsky Y, Polyak K. Cell type-specific DNA  
401 methylation patterns in the human breast. *Proc Natl Acad Sci U S A.* 2008 Sep  
402 16;105(37):14076–14081. PMCID: PMC2532972
- 403 13. Christensen BC, Houseman EA, Marsit CJ, Zheng S, Wrensch MR, Wiemels JL,  
404 Nelson HH, Karagas MR, Padbury JF, Bueno R, Sugarbaker DJ, Yeh R-F, Wiencke  
405 JK, Kelsey KT. Aging and environmental exposures alter tissue-specific DNA  
406 methylation dependent upon CpG island context. *PLoS Genet.* 2009  
407 Aug;5(8):e1000602. PMCID: PMC2718614
- 408 14. Santagata S, Thakkar A, Ergonul A, Wang B, Woo T, Hu R, Harrell JC, McNamara  
409 G, Schwede M, Culhane AC, Kindelberger D, Rodig S, Richardson A, Schnitt SJ,  
410 Tamimi RM, Ince TA. Taxonomy of breast cancer based on normal cell  
411 phenotype predicts outcome. *J Clin Invest.* 2014 Feb;124(2):859–870. PMCID:  
412 PMC3904619
- 413 15. Koestler DC, Christensen B, Karagas MR, Marsit CJ, Langevin SM, Kelsey KT,  
414 Wiencke JK, Houseman EA. Blood-based profiles of DNA methylation predict  
415 the underlying distribution of cell types: a validation analysis. *Epigenetics Off J*  
416 *DNA Methylation Soc.* 2013 Aug;8(8):816–826. PMCID: PMC3883785
- 417 16. Houseman EA, Kile ML, Christiani DC, Ince TA, Kelsey KT, Marsit CJ. Reference-  
418 free deconvolution of DNA methylation data and mediation by cell composition  
419 effects. *BMC Bioinformatics.* 2016;17(1):259. PMID: 27358049
- 420 17. Houseman EA, Kelsey KT, Wiencke JK, Marsit CJ. Cell-composition effects in the  
421 analysis of DNA methylation array data: a mathematical perspective. *BMC*  
422 *Bioinformatics.* 2015 Mar 21;16:95. PMCID: PMC4392865
- 423 18. Houseman EA, Ince TA. Normal cell-type epigenetics and breast cancer  
424 classification: a case study of cell mixture-adjusted analysis of DNA methylation  
425 data from tumors. *Cancer Inform.* 2014;13(Suppl 4):53–64. PMCID:  
426 PMC4264613

- 427 19. Bagchi A, Mills AA. The Quest for the 1p36 Tumor Suppressor. *Cancer Res.*  
428 2008 Apr 15;68(8):2551–2556. PMID: 18413720
- 429 20. Fleischer T, Frigessi A, Johnson KC, Edvardsen H, Touleimat N, Klajic J, Riis ML,  
430 Haakensen VD, Wärnberg F, Naume B, Helland A, Børresen-Dale A-L, Tost J,  
431 Christensen BC, Kristensen VN. Genome-wide DNA methylation profiles in  
432 progression to in situ and invasive carcinoma of the breast with impact on gene  
433 transcription and prognosis. *Genome Biol.* 2014;15(8):435. PMCID:  
434 PMC4165906
- 435 21. Titus AJ, Way GP, Johnson KC, Christensen BC. Analytical code for “Reference-  
436 free deconvolution of DNA methylation signatures identifies common  
437 differentially methylated gene regions on 1p36 across breast cancer subtypes.”  
438 2017 Mar 10; Available from: <https://zenodo.org/badge/latestdoi/45754471>
- 439 22. Fang F, Turcan S, Rimner A, Kaufman A, Giri D, Morris LGT, Shen R, Seshan V,  
440 Mo Q, Heguy A, Baylin SB, Ahuja N, Viale A, Massague J, Norton L, Vahdat LT,  
441 Moynahan ME, Chan TA. Breast Cancer Methylomes Establish an Epigenomic  
442 Foundation for Metastasis. *Sci Transl Med.* 2011 Mar 23;3(75):75ra25. PMID:  
443 21430268
- 444 23. Orsetti B, Nugoli M, Cervera N, Lasorsa L, Chuchana P, Rouge C, Ursule L,  
445 Nguyen C, Bibeau F, Rodriguez C, Theillet C. Genetic profiling of chromosome 1  
446 in breast cancer: mapping of regions of gains and losses and identification of  
447 candidate genes on 1q. *Br J Cancer.* 2006 Nov 20;95(10):1439–1447. PMCID:  
448 PMC2360604
- 449 24. Munn KE, Walker RA, Varley JM. Frequent alterations of chromosome 1 in  
450 ductal carcinoma in situ of the breast. *Oncogene.* 1995 Apr 20;10(8):1653–  
451 1657. PMID: 7731721
- 452 25. Mamessier E, Song JY, Eberle FC, Pack S, Drevet C, Chetaille B, Abdullaev Z,  
453 Adelaide J, Birnbaum D, Chaffanet M, Pittaluga S, Roulland S, Chott A, Jaffe ES,  
454 Nadel B. Early lesions of follicular lymphoma: a genetic perspective.  
455 *Haematologica.* 2014 Mar;99(3):481–488. PMCID: PMC3943311
- 456 26. Bieche I, Champeme MH, Lidereau R. Loss and gain of distinct regions of  
457 chromosome 1q in primary breast cancer. *Clin Cancer Res Off J Am Assoc*  
458 *Cancer Res.* 1995 Jan;1(1):123–127. PMID: 9815894
- 459 27. Curtis C, Shah SP, Chin S-F, Turashvili G, Rueda OM, Dunning MJ, Speed D, Lynch  
460 AG, Samarajiwa S, Yuan Y, Graf S, Ha G, Haffari G, Bashashati A, Russell R,  
461 McKinney S, Langerod A, Green A, Provenzano E, Wishart G, Pinder S, Watson P,  
462 Markowitz F, Murphy L, Ellis I, Purushotham A, Borresen-Dale A-L, Brenton JD,  
463 Tavaré S, Caldas C, Aparicio S. The genomic and transcriptomic architecture of  
464 2,000 breast tumours reveals novel subgroups. *Nature.* 2012 Apr  
465 18;486(7403):346–352. PMCID: PMC3440846

- 466 28. White PS, Thompson PM, Gotoh T, Okawa ER, Igarashi J, Kok M, Winter C,  
467 Gregory SG, Hogarty MD, Maris JM, Brodeur GM. Definition and  
468 characterization of a region of 1p36.3 consistently deleted in neuroblastoma.  
469 *Oncogene*. 2005 Apr 14;24(16):2684–2694. PMID: 15829979
- 470 29. Attiyeh EF, London WB, Mossé YP, Wang Q, Winter C, Khazi D, McGrady PW,  
471 Seeger RC, Look AT, Shimada H, Brodeur GM, Cohn SL, Matthay KK, Maris JM.  
472 Chromosome 1p and 11q Deletions and Outcome in Neuroblastoma. *N Engl J*  
473 *Med*. 2005 Nov 24;353(21):2243–2253. PMID: 16306521
- 474 30. Caren H, Ejeskar K, Fransson S, Hesson L, Latif F, Sjoberg R-M, Krona C,  
475 Martinsson T. A cluster of genes located in 1p36 are down-regulated in  
476 neuroblastomas with poor prognosis, but not due to CpG island methylation.  
477 *Mol Cancer*. 2005 Mar 1;4(1):10. PMID: PMC554762
- 478 31. Carén H, Fransson S, Ejeskär K, Kogner P, Martinsson T. Genetic and epigenetic  
479 changes in the common 1p36 deletion in neuroblastoma tumours. *Br J Cancer*.  
480 2007 Nov 19;97(10):1416–1424. PMID: PMC2360241
- 481 32. Henrich K-O, Schwab M, Westermann F. 1p36 tumor suppression--a matter of  
482 dosage? *Cancer Res*. 2012 Dec 1;72(23):6079–6088. PMID: 23172308
- 483 33. Lefebvre C, Bachelot T, Filleron T, Pedrero M, Campone M, Soria J-C, Massard C,  
484 Levy C, Arnedos M, Lacroix-Triki M, Garrabey J, Boursin Y, Deloger M, Fu Y,  
485 Commo F, Scott V, Lacroix L, Dieci MV, Kamal M, Dieras V, Goncalves A, Ferrero  
486 J-M, Romieu G, Vanlemmens L, Mouret Reynier M-A, They J-C, Le Du F, Guiu S,  
487 Dalenc F, Clapisson G, Bonnefoi H, Jimenez M, Le Tourneau C, Andre F.  
488 Mutational Profile of Metastatic Breast Cancers: A Retrospective Analysis. *PLoS*  
489 *Med*. 2016 Dec;13(12):e1002201. PMID: PMC5189935
- 490 34. Stoeck A, Lejnine S, Truong A, Pan L, Wang H, Zang C, Yuan J, Ware C, MacLean J,  
491 Garrett-Engele PW, Kluk M, Laskey J, Haines BB, Moskaluk C, Zawel L, Fawell S,  
492 Gilliland G, Zhang T, Kremer BE, Knoechel B, Bernstein BE, Pear WS, Liu XS,  
493 Aster JC, Sathyanarayanan S. Discovery of biomarkers predictive of GSI  
494 response in triple-negative breast cancer and adenoid cystic carcinoma. *Cancer*  
495 *Discov*. 2014 Oct;4(10):1154–1167. PMID: PMC4184927
- 496 35. Burks J, Reed RE, Desai SD. Free ISG15 triggers an antitumor immune response  
497 against breast cancer: a new perspective. *Oncotarget*. 2015 Mar 30;6(9):7221–  
498 7231. PMID: PMC4466680
- 499 36. Andersen JB, Hassel BA. The interferon regulated ubiquitin-like protein, ISG15,  
500 in tumorigenesis: friend or foe? *Cytokine Growth Factor Rev*. 2006  
501 Dec;17(6):411–421. PMID: 17097911



- 502 37. Xu L, Tan AC, Winslow RL, Geman D. Merging microarray data from separate  
503 breast cancer studies provides a robust prognostic test. *BMC Bioinformatics*.  
504 2008 Feb 27;9:125. PMID: PMC2409450
- 505 38. Rodriguez-Martinez A, Alarmo E-L, Saarinen L, Ketolainen J, Nousiainen K,  
506 Hautaniemi S, Kallioniemi A. Analysis of BMP4 and BMP7 signaling in breast  
507 cancer cells unveils time-dependent transcription patterns and highlights a  
508 common synexpression group of genes. *BMC Med Genomics*. 2011 Nov 25;4:80.  
509 PMID: PMC3229454
- 510 39. Hansen KD, Fortin JP. Minfi tutorial. *BioC2014*. 2014;
- 511 40. Chen Y, Lemire M, Choufani S, Butcher DT, Grafodatskaya D, Zanke BW,  
512 Gallinger S, Hudson TJ, Weksberg R. Discovery of cross-reactive probes and  
513 polymorphic CpGs in the Illumina Infinium HumanMethylation450 microarray.  
514 *Epigenetics Off J DNA Methylation Soc*. 2013 Feb;8(2):203–209. PMID:  
515 PMC3592906
- 516 41. Wilhelm-Benartzi CS, Koestler DC, Karagas MR, Flanagan JM, Christensen BC,  
517 Kelsey KT, Marsit CJ, Houseman EA, Brown R. Review of processing and  
518 analysis methods for DNA methylation array data. *Br J Cancer*. 2013 Sep  
519 17;109(6):1394–1402. PMID: PMC3777004
- 520 42. Edge S, Byrd D, Compton C, Fritz A, Greene F, Trotti A, editors. *AJCC cancer*  
521 *staging manual*. 7th ed. New York, NY: Springer; 2010.
- 522 43. Brunet J-P, Tamayo P, Golub TR, Mesirov JP. Metagenes and molecular pattern  
523 discovery using matrix factorization. *Proc Natl Acad Sci U S A*. 2004 Mar  
524 23;101(12):4164–4169. PMID: PMC384712
- 525 44. Dabney A, Storey J. qvalue: Q-value estimation for false discovery rate control.  
526 R Package Version 1.4.30.
- 527 45. Huang DW, Sherman BT, Lempicki RA. Bioinformatics enrichment tools: paths  
528 toward the comprehensive functional analysis of large gene lists. *Nucleic Acids*  
529 *Res*. 2009 Jan;37(1):1–13. PMID: PMC2615629
- 530 46. Huang DW, Sherman BT, Lempicki RA. Systematic and integrative analysis of  
531 large gene lists using DAVID bioinformatics resources. *Nat Protoc*.  
532 2009;4(1):44–57. PMID: 19131956
- 533 47. Ashburner M, Ball CA, Blake JA, Botstein D, Butler H, Cherry JM, Davis AP,  
534 Dolinski K, Dwight SS, Eppig JT, Harris MA, Hill DP, Issel-Tarver L, Kasarskis A,  
535 Lewis S, Matese JC, Richardson JE, Ringwald M, Rubin GM, Sherlock G. Gene  
536 ontology: tool for the unification of biology. The Gene Ontology Consortium.  
537 *Nat Genet*. 2000 May;25(1):25–29. PMID: PMC3037419



- 538 48. Kanehisa M, Goto S. KEGG: kyoto encyclopedia of genes and genomes. *Nucleic*  
539 *Acids Res.* 2000 Jan 1;28(1):27–30. PMID: PMC102409
- 540 49. Huang DW, Sherman BT, Lempicki RA. Systematic and integrative analysis of  
541 large gene lists using DAVID bioinformatics resources. *Nat Protoc.*  
542 2009;4(1):44–57. PMID: 19131956
- 543 50. Gao J, Aksoy BA, Dogrusoz U, Dresdner G, Gross B, Sumer SO, Sun Y, Jacobsen A,  
544 Sinha R, Larsson E, Cerami E, Sander C, Schultz N. Integrative analysis of  
545 complex cancer genomics and clinical profiles using the cBioPortal. *Sci Signal.*  
546 2013 Apr 2;6(269):p11. PMID: PMC4160307
- 547

548 SUPPLEMENTAL FIGURES:

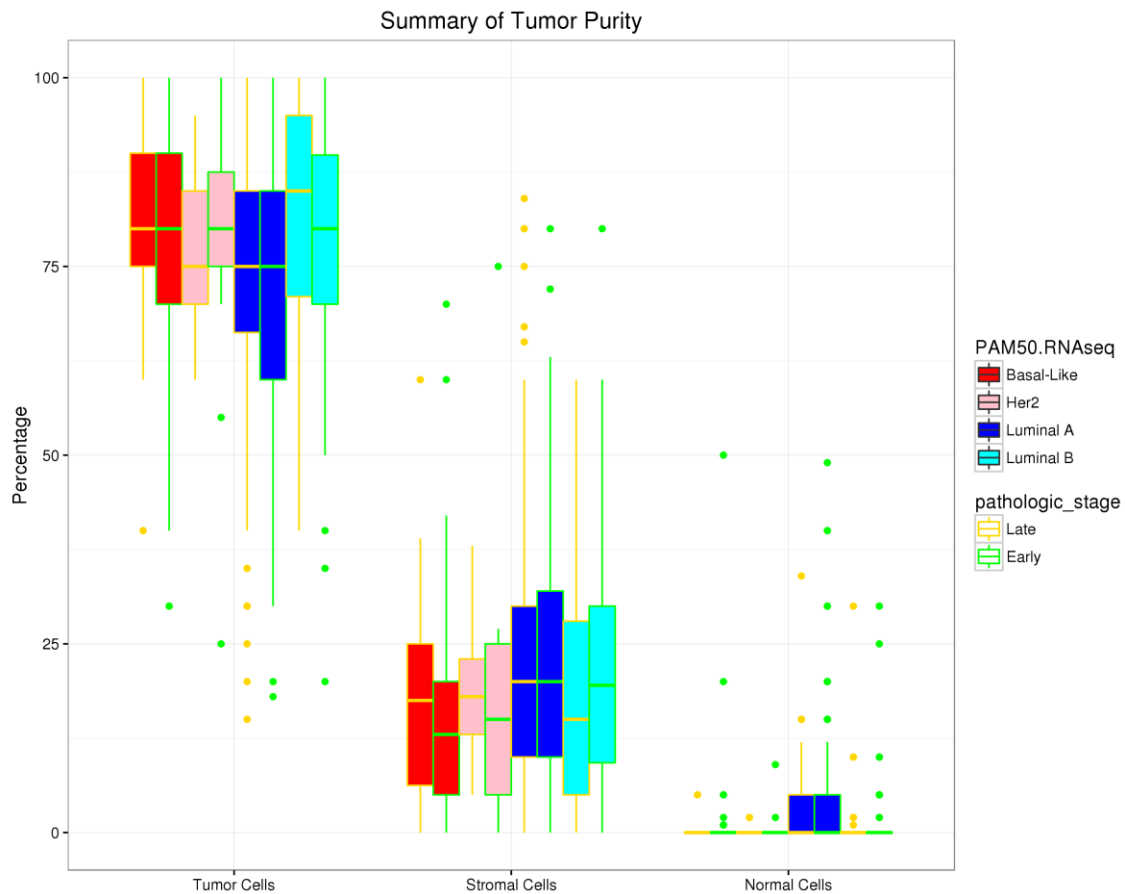

549

550 *Supplementary Figure S1. Box plots show the distribution of tumor purity across all*  
551 *subtypes for both early and late stages of the TCGA dataset. The measurements estimated*  
552 *by TCGA are based on histology slides and indicate the estimated distribution of the*  
553 *number of tumor cells, stromal cells, and normal cells in each sample. See the NCI CDE*  
554 *Browser for more details.*

555

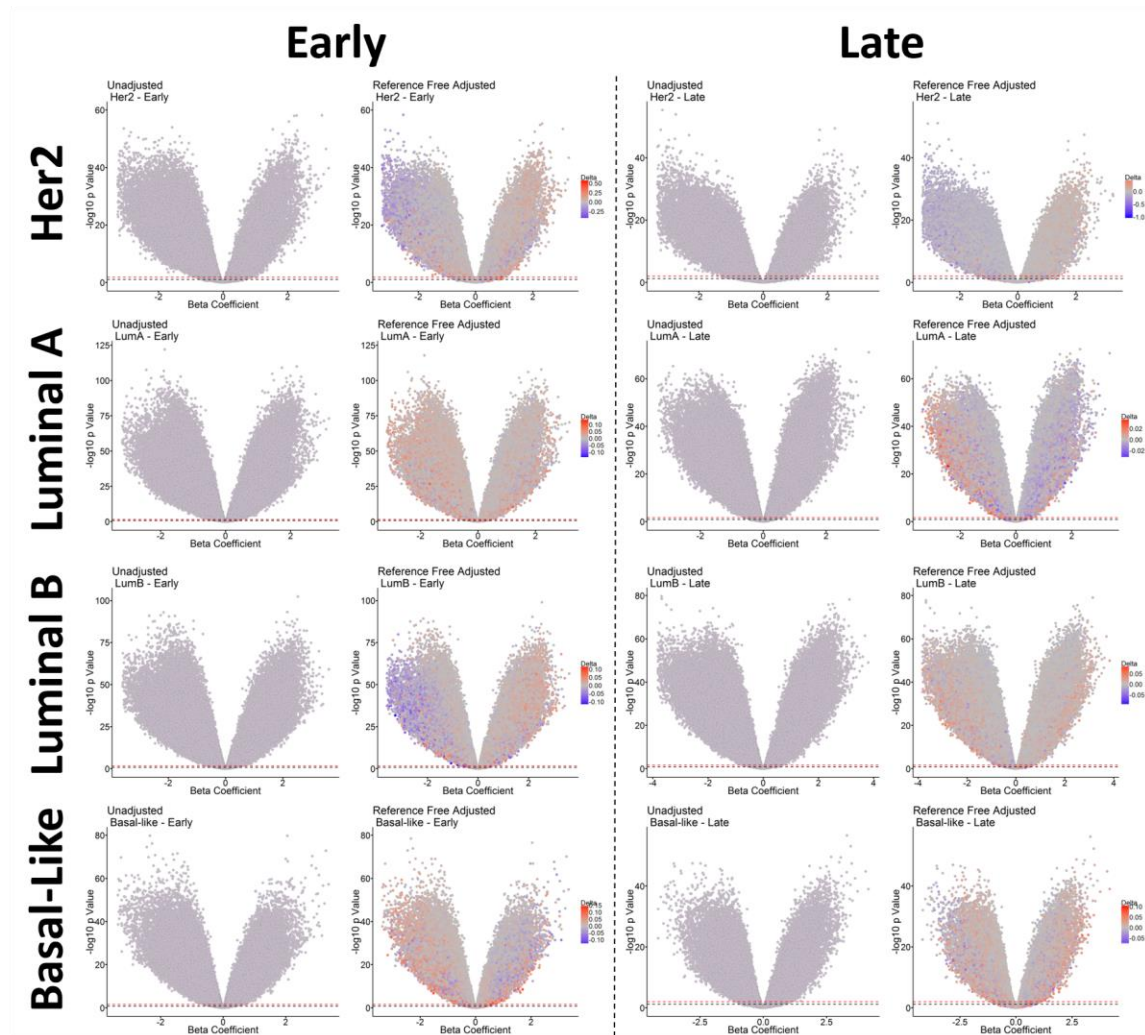

556

557 *Supplementary Figure S2. Volcano plots from the eight models. The left most panel in*  
558 *each model indicates unadjusted P values and the right panel indicates RefFree adjusted*  
559 *P values. Each point represents a CpG considered in the model and the color of the*  
560 *points represents the change in the beta coefficient following adjustment (delta value).*  
561 *The red lines indicate a Q value cutoff of 0.01 and the black lines indicate a Q value*  
562 *cutoff of 0.05.*

563

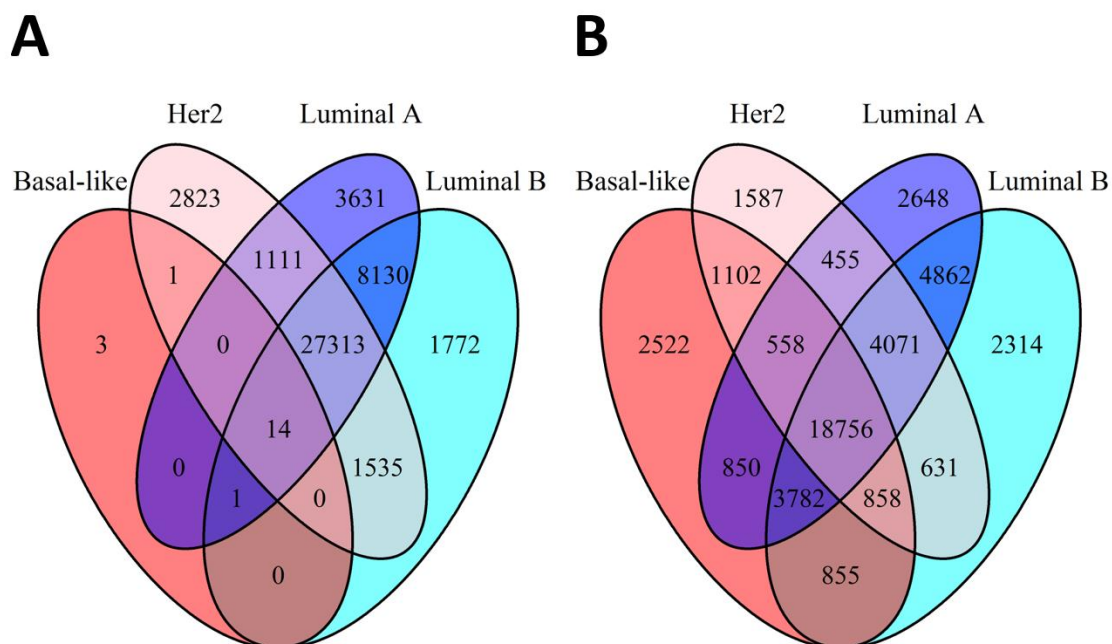

564

565 *Supplementary Figure S3. Venn diagram depicting overlapping Illumina annotation file*

566 *UCSC regions between (A) early and (B) late stage tumors stratified by subtype. The*

567 *regions consist of mappings relative to CpG island definitions (e.g. <Gene Name>*

568 *N\_Shore).*

569

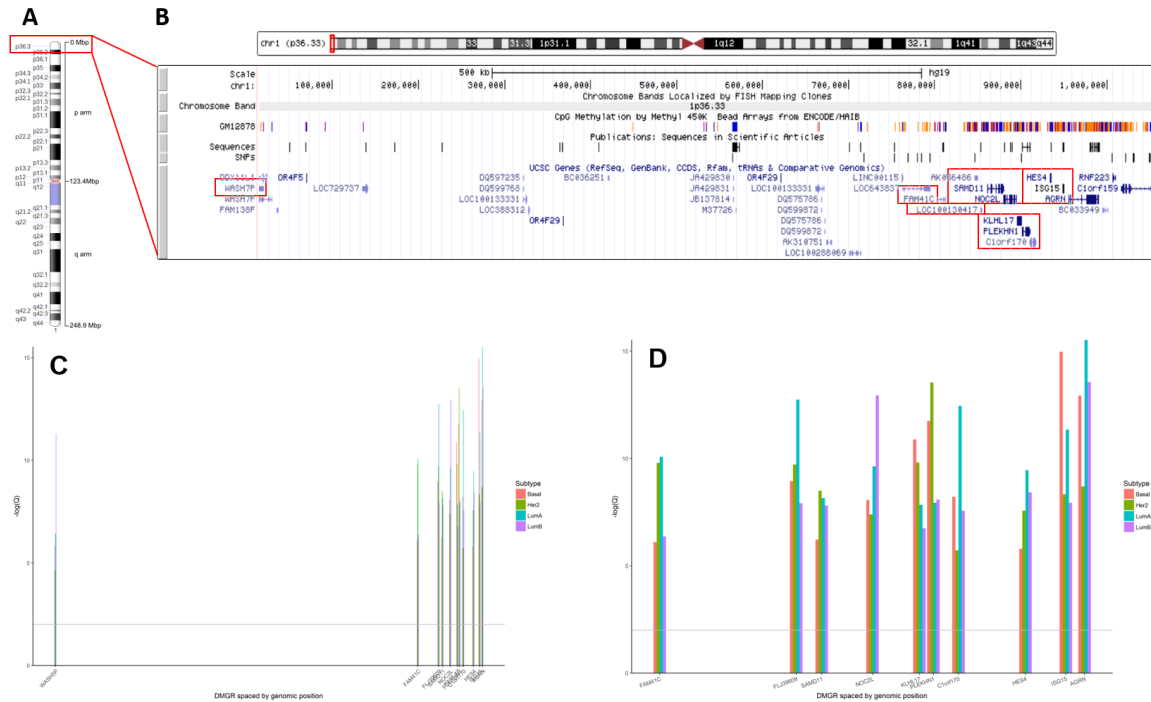

570

571 **Supplementary Figure S4.** Diagram of chromosome 1. (A) The entire chromosome 1  
 572 with regions annotated. (B) A zoomed in view of chromosome 1p36.3 with each identified  
 573 gene annotated on a track and highlighted in red boxes indicating a gene cluster between  
 574 base pairs 868,071 - 1,056,116. (C) The negative log of the median Q-value for all CpG  
 575 sites within each DMGR, stratified by PAM50 subtype and arranged along the x-axis  
 576 according to genomic position reflected in panel B. (D) The negative log of the median  
 577 Q-value for all CpG sites within each DMGR in the ten gene cluster (without WASH5P),  
 578 stratified by PAM50 subtype and arranged along the x-axis according to genomic  
 579 position reflected in panel B.

580

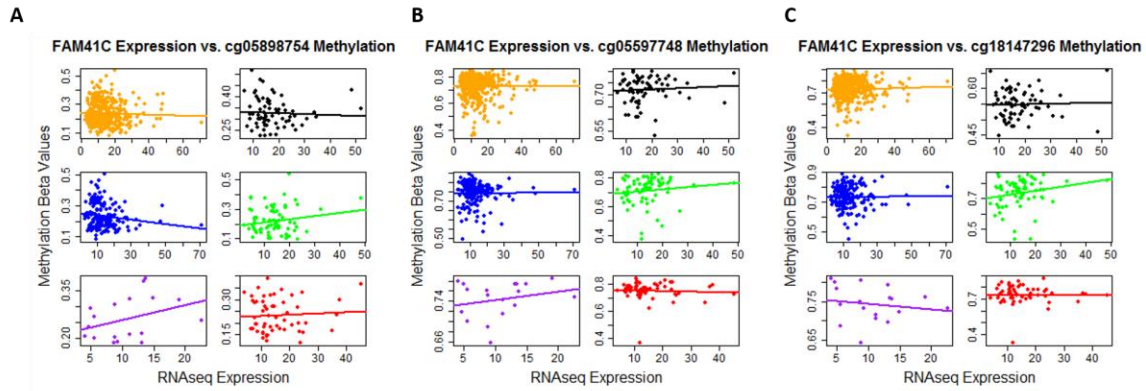

581

582 *Supplementary Figure S5. The relationship between differentially methylated CpG sites*

583 *and FAM41C gene expression in early stage tumors and normal tissue with matched*

584 *RNAseq samples stratified by PAM50 subtype. All tumors (orange), all normal tissue*

585 *(black), Luminal A (blue), Luminal B (green), Her2 (purple), and Basal-like (red) are*

586 *given in the different facets of the figure.*

587

588

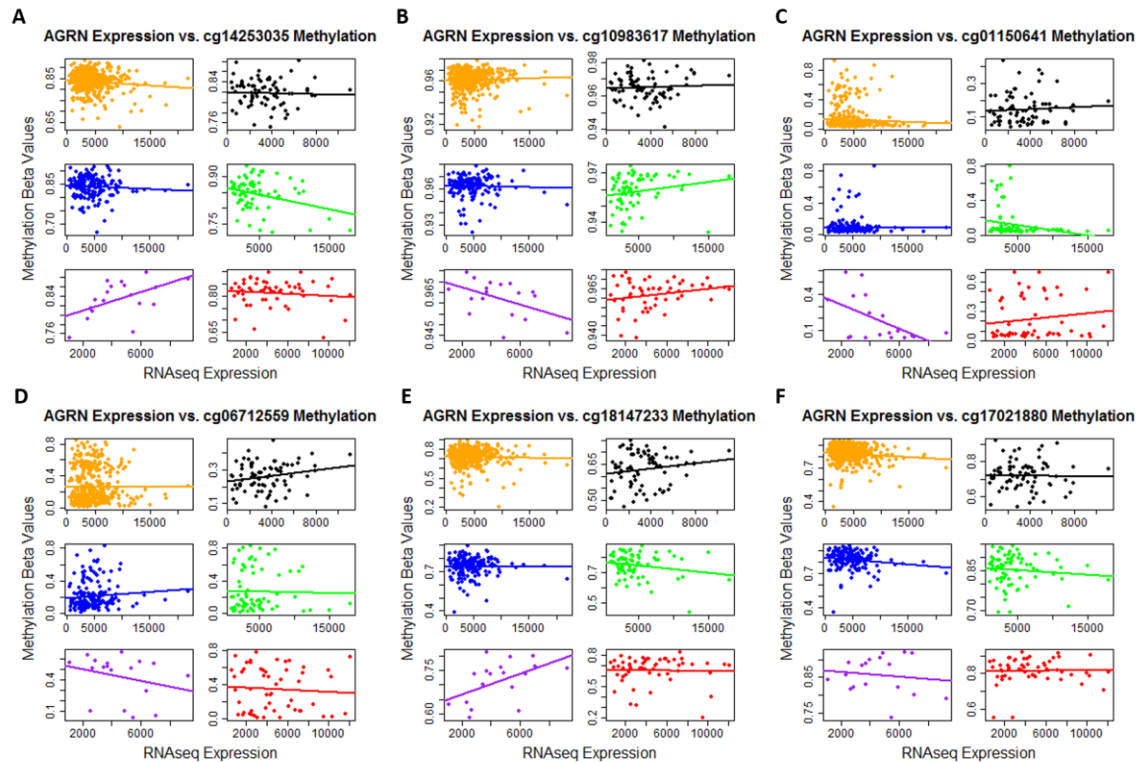

589

590 *Supplementary Figure S6. The relationship between differentially methylated CpG sites*

591 *and AGRN gene expression in early stage tumors and normal tissue with matched*

592 *RNAseq samples stratified by PAM50 subtype. All tumors (orange), all normal tissue*

593 *(black), Luminal A (blue), Luminal B (green), Her2 (purple), and Basal-like (red) are*

594 *given in the different facets of the figure.*

595



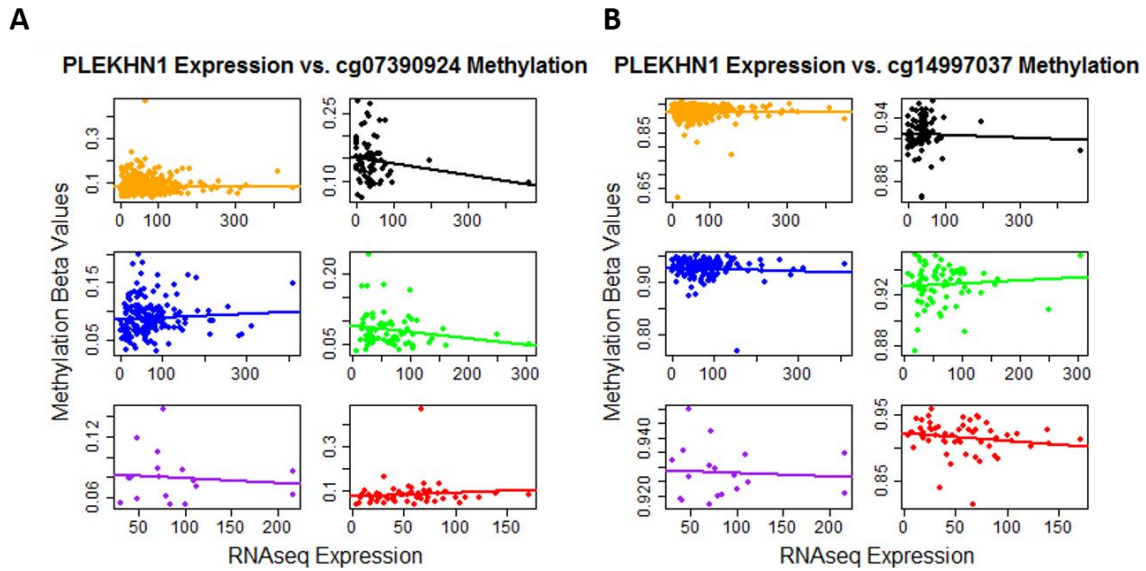

596

597 *Supplementary Figure S7. The relationship between differentially methylated CpG sites*

598 *and PLEKHN1 gene expression in early stage tumors and normal tissue with matched*

599 *RNAseq samples stratified by PAM50 subtype. All tumors (orange), all normal tissue*

600 *(black), Luminal A (blue), Luminal B (green), Her2 (purple), and Basal-like (red) are*

601 *given in the different facets of the figure.*

602



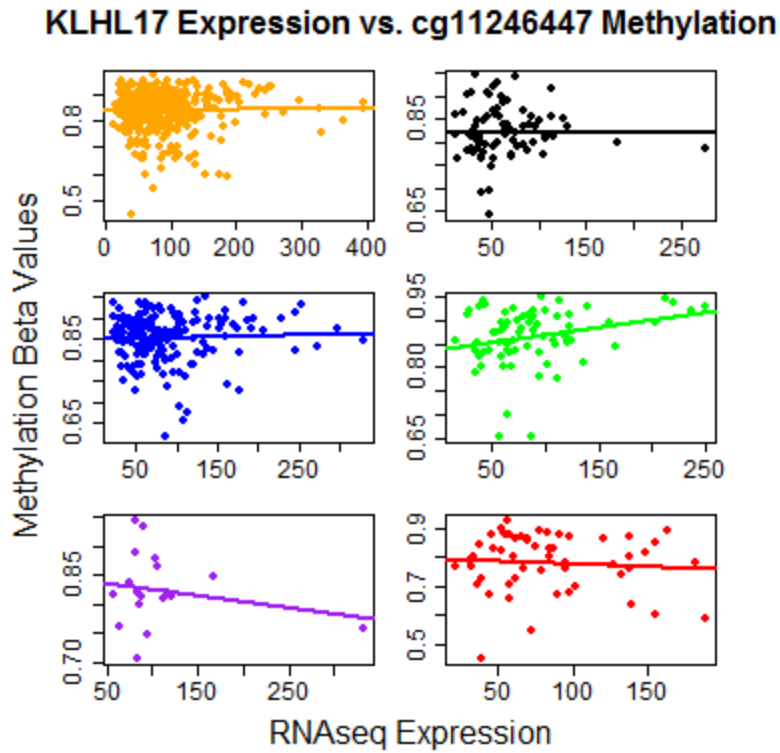

603

604 *Supplementary Figure S8. The relationship between differentially methylated CpG sites*

605 *and KLHL17 gene expression in early stage tumors and normal tissue with matched*

606 *RNAseq samples stratified by PAM50 subtype. All tumors (orange), all normal tissue*

607 *(black), Luminal A (blue), Luminal B (green), Her2 (purple), and Basal-like (red) are*

608 *given in the different facets of the figure.*

609

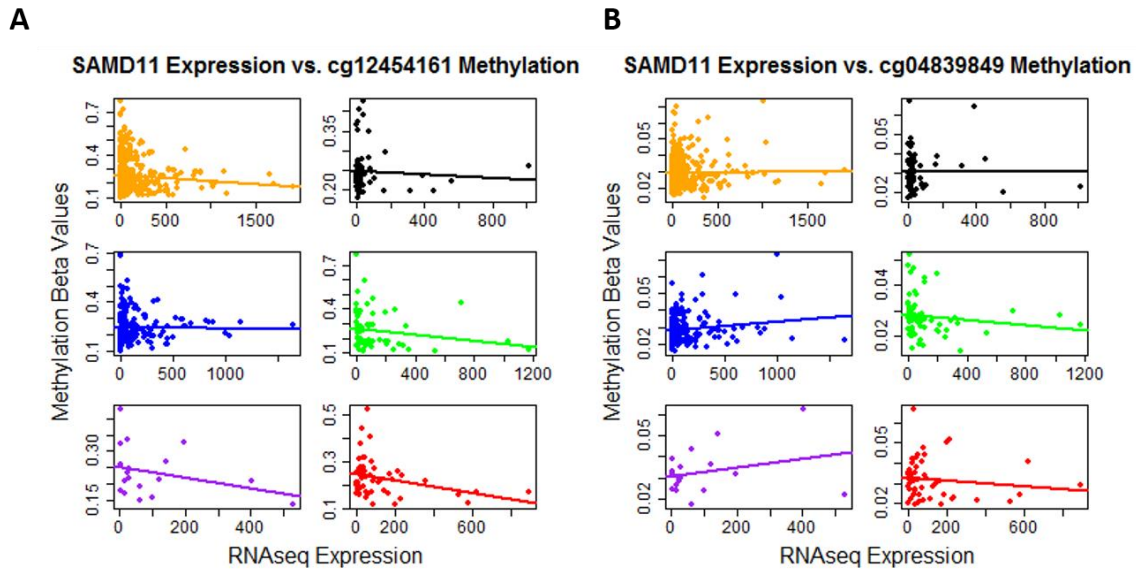

610

611 **Supplementary Figure S9.** *The relationship between differentially methylated CpG sites*  
612 *and SAMD11 gene expression in early stage tumors and normal tissue with matched*  
613 *RNAseq samples stratified by PAM50 subtype. All tumors (orange), all normal tissue*  
614 *(black), Luminal A (blue), Luminal B (green), Her2 (purple), and Basal-like (red) are*  
615 *given in the different facets of the figure.*

616

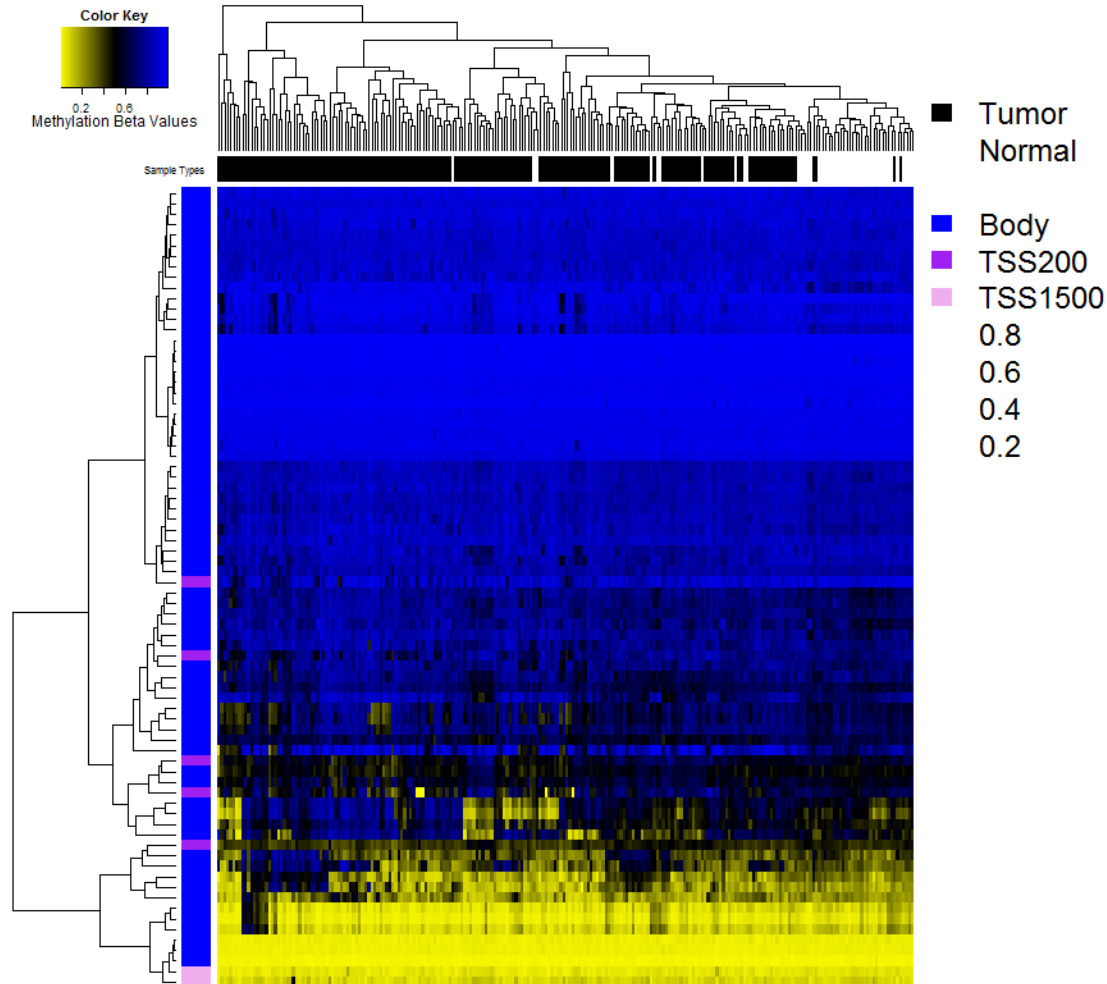

617

618 **Supplementary Figure S10.** Results from the validation set (Fleischer et al 2014;  
619 GSE60185). Validation set raw (unadjusted) beta value heatmap of the significantly  
620 differentially methylated CpG sites in the common early stage differentially methylated  
621 gene regions (DMGRs) identified in the initial analysis. The genomic context is given in  
622 the vertical color bar (blue = gene body, dark pink = TSS200, light pink = TSS1500) and  
623 tumor vs. normal status is given in the horizontal color bar (black = tumor, white =  
624 normal tissue). In the heatmap, yellow indicates low methylation and blue indicates high  
625 methylation.

626

627 SUPPLAMENTAL TABLES:

628 Due to size limitations of this document and the size of the supplemental tables available

629 for this manuscript, supplemental tables may be found at the following DOI link:

630 DOI: [10.5281/zenodo.400247](https://doi.org/10.5281/zenodo.400247)
